# Supplementary material
Source: PubMed Central journal article supplement (PMC9479031)
Supplement: bloodBLD2022015850C-suppl1.pdf [file bloodBLD2022015850C-suppl1.pdf]

## Supplemental Tables

### Supplemental Table 1. Mastocytosis Subtypes (Variants)

#### Cutaneous mastocytosis

- Urticaria pigmentosa / maculopapular cutaneous mastocytosis
- Diffuse cutaneous mastocytosis
- Mastocytoma of skin

#### Systemic mastocytosis

- Indolent systemic mastocytosis (includes bone marrow mastocytosis)<sup>a</sup>
- Smoldering systemic mastocytosis <sup>a</sup>
- Aggressive systemic mastocytosis <sup>a</sup>
- Mast cell leukemia
- Systemic mastocytosis with an associated myeloid neoplasm

#### Mast cell sarcoma

<sup>a</sup> The diagnosis of these variants of systemic mastocytosis require correlation with B and C findings.

### Supplemental Table 2. Systemic Mastocytosis: B-findings

1. High mast cell burden, >30% of BM cellularity by mast cell aggregates (assessed on BM biopsy) and serum tryptase >200 ng/mL
2. Cytopenia (not meeting criteria for C findings) or -cytosis. Reactive causes are excluded, and criteria for other myeloid neoplasms are not met.
3. Hepatomegaly without impairment of liver function, or splenomegaly without features of hypersplenism including thrombocytopenia, and/ or lymphadenopathy (>1 cm size) on palpation or imaging

### Supplemental Table 3. Mast Cell Leukemia

1. Meets diagnostic criteria for SM
2. BM aspirate shows  $\geq 20\%$  atypical immature mast cells<sup>a/b</sup>

<sup>a</sup> Atypical immature mast cells include promastocytes, metachromatic blast-like forms, multinucleated or highly pleomorphic mast cells.

<sup>b</sup> In the presence of a suboptimal aspirate (dry tap), a BM biopsy showing a dense, diffuse mast cell infiltration of atypical immature mast cells is sufficient to support the diagnosis of mast cell leukemia.

**Supplemental Table 4.** Features of the various clonal cytopenias

| Type                                                 |  | Dysplasia <sup>a</sup>                                       | Other features                                                                                      |
|------------------------------------------------------|--|--------------------------------------------------------------|-----------------------------------------------------------------------------------------------------|
| Clonal cytopenia of undetermined significance (CCUS) |  | Absent                                                       | No comorbid condition that explains the cytopenia; no MDS-defining genetic abnormality <sup>b</sup> |
| VEXAS syndrome                                       |  | Absent <sup>c</sup>                                          | Autoimmune manifestations<br><i>UBA1</i> mutation; no MDS-defining genetic abnormality <sup>b</sup> |
| Myelodysplastic syndrome                             |  | Present, or an MDS-defining genetic abnormality <sup>b</sup> | Classified according to Table 20                                                                    |

<sup>a</sup>Defined as dysplastic cytologic changes in  $\geq 10\%$  of erythroid cells, granulocytic cells, and/or megakaryocytes; absence of dysplasia requires less than these thresholds in all lineages in an adequate bone marrow sample.

<sup>b</sup>MDS-defining genetic abnormalities are *SF3B1* mutation (VAF  $>10\%$ ), multi-hit *TP53* mutation (VAF  $>10\%$ ), or del(5q), del(7q), -7 or complex karyotype detected by karyotype. Additional features may be required in the setting of a germline predisposition condition (see “Diagnosis of Myelodysplastic Syndrome in the Setting of Germline Predisposition” section).

<sup>c</sup>Vacuolation of erythroid and myeloid precursors are not considered to be MDS-defining dysplastic features in the setting of VEXAS.

**Supplemental Table 5.** Symptoms and signs at diagnosis of JMML.<sup>1</sup>

|                |      |                    |      |
|----------------|------|--------------------|------|
| Pallor         | 64%  | Splenomegaly       | 97%  |
| Fever          | 54%  | Hepatomegaly       | 97%  |
| Infection      | 45%  | Lymphadenopathy    | 76%  |
| Bleeding       | 46%  | Skin rash          | 36%  |
| Cough          | 40%  | Café au lait spots | 12%  |
| Abdominal pain | 7%   | Xanthoma           | 7%   |
| Bone pain      | < 4% | CNS infiltration*  | < 3% |
| Diarrhea       | < 4% |                    |      |

\*myeloid sarcoma, diabetes insipidus, facial palsy.

**Supplemental Table 6.** Acute myeloid leukemia (AML) with other rare recurring translocations

- AML with t(1;3)(p36.3;q21.3)/*PRDM16::RPN1*
- AML with t(3;5)(q25.3;q35.1)/*NPM1::MLF1*
- AML with t(8;16)(p11.2;p13.3)/*KAT6A::CREBBP*
- AML (megakaryoblastic) with t(1;22)(p13.3;q13.1)/*RBM15::MRTF1*\*
- AML with t(5;11)(q35.2;p15.4)/ *NUP98::NSD1*\*
- AML with t(11;12)(p15.4;p13.3)/*NUP98::KMD5A*\*
- AML with *NUP98* and other partners\*
- AML with t(7;12)(q36.3;p13.2)/*ETV6::MNX1*\*
- AML with t(10;11)(p12.3;q14.2)/*PICALM::MLLT10*
- AML with t(16;21)(p11.2;q22.2)/*FUS::ERG*
- AML with t(16;21)(q24.3;q22.1)/*RUNX1::CBFA2T3*
- AML with inv(16)(p13.3q24.3)/*CBFA2T3::GLIS2*\*

\* Occurs predominantly in infants and children

**Supplemental Table 7.** Provisional entities in acute lymphoblastic leukemia/lymphoma (ALL) (See references for reviews and additional references therein) <sup>2-14</sup>

| B-ALL                                       |                         |                                                                                             |                                                                                                                                                                                                                 |                                            |                                        |
|---------------------------------------------|-------------------------|---------------------------------------------------------------------------------------------|-----------------------------------------------------------------------------------------------------------------------------------------------------------------------------------------------------------------|--------------------------------------------|----------------------------------------|
| Subtype                                     | Frequency               | Gene expression pattern                                                                     | Genomics                                                                                                                                                                                                        | Immunophenotype                            | Comment                                |
| <i>ETV6::RUNX1</i> -like                    | <5%, mostly children    | GEP Clusters with <i>ETV6::RUNX1</i>                                                        | Fusions or CNAs in ETS family genes including <i>ETV6</i> , <i>FUS</i> and also <i>IKZF1</i> ; some cases harbor germline LOF <i>ETV6</i> mutations                                                             | CD27+CD44- or low, like <i>ETV6::RUNX1</i> | Good prognosis in children, not adults |
| <i>PAX5</i> alteration** ( <i>PAX5alt</i> ) | 10% children and adults | Broad GEP cluster near Ph like                                                              | Various mutations (esp. compound heterozygosity for R38, R140), intragenic amplifications and non-kinase fusions ( <i>ETV6</i> most common)                                                                     |                                            | Intermediate prognosis                 |
| <i>ZEB2</i> (p.H1038R) or <i>IGH::CEBPE</i> | < 1%                    | GEP cluster of <i>ZEB2</i> H1038R and <i>IGH::CEBPE</i> fusion                              | <i>ZEB2</i> (H1038R) mutation, mostly coexisting with <i>IGH::CEBPE</i> or other known gene fusions, Frequent <i>NRAS</i> mutations (50%), LMO1 upregulation and downregulation of <i>SMAD1</i> and <i>BMP2</i> |                                            |                                        |
| <i>KMT2A</i> -like                          | <1%                     | GEP Clusters with <i>KMT2A</i>                                                              | Some with <i>HOXA</i> fusions                                                                                                                                                                                   |                                            |                                        |
| <i>ZNF384</i> -like                         | <1%                     | GEP clusters with <i>ZNF384</i> or <i>ZNF362</i>                                            | unknown                                                                                                                                                                                                         | Like <i>ZNF384</i>                         |                                        |
| T-ALL/LL                                    |                         |                                                                                             |                                                                                                                                                                                                                 |                                            |                                        |
| Subtype                                     | Frequency               | Partner genes/other rearrangements                                                          |                                                                                                                                                                                                                 | Immunophenotype                            | Comment                                |
| <i>HOXA</i> dysregulated                    | 15-25%                  | <i>HOXA::TRB/TRG</i> ; <i>KMT2A</i> -Rearranged; <i>PICALM::MLLT10</i> ; <i>SET::NUP214</i> |                                                                                                                                                                                                                 | Immature, some ETP                         |                                        |

|                             |                                        |                                                                                            |                                                               |                                                                               |
|-----------------------------|----------------------------------------|--------------------------------------------------------------------------------------------|---------------------------------------------------------------|-------------------------------------------------------------------------------|
| <i>SPI1</i> rearrangement   | <5%, children                          | <i>STMN1; TCF7; BCL11B</i>                                                                 | CD4-, CD8+/-, DR+                                             | Very poor prognosis                                                           |
| <i>TLX1</i> rearrangement   | 5-10% children; near 30% adult         | TCR                                                                                        | CD4+, CD8+/-, CD1a+, cortical thymocyte                       | Good prognosis                                                                |
| <i>TLX3</i> rearrangement   | 20-25% children <5% adult              | TCR; <i>BCL11B; CDK6</i>                                                                   | CD4+, CD8+/-, CD1a+, cortical thymocyte, some ETP or near ETP | Good prognosis; <i>BCL11B</i> overexpression different from ETP group         |
| <i>NKX2</i> rearrangement   | <5% children                           | <i>NKX2.1/NKX2.2/NKX2.5::TCR; BCL11B; CDK6</i>                                             | CD4+, CD8+                                                    | Similar GEP to <i>TLX1-R</i>                                                  |
| <i>TAL1-2</i> rearrangement | 30-40% (TAL2 rare)                     | TRA/D; TRB ( <i>TAL2</i> ); 1p32 deletion ( <i>STIL</i> ); intergenic SNV (super enhancer) | CD3+, late cortical                                           | Poor prognosis                                                                |
| <i>LMO1-2</i> rearrangement | <i>LMO1-R</i> -5%<br><i>LMO2-R</i> 10% | TCR; cryptic deletion; enhancer/promoter mutations                                         | Immature but not-ETP                                          | Form LMO complex with bHLH factors. Extremely high LMO expression.            |
| <i>BHLH</i> , other         | <2%                                    | <i>LYL1::TRB</i><br><i>OLIG2/BHLHB1::TCR</i>                                               | Immature but not ETP                                          | Extremely high LMO expression<br><i>LYL1-R</i> shows stem cell-like signature |

<sup>a</sup> Not all examples of these entities can be defined by conventional FISH or WTS alone because of intragenic alterations that dysregulate these genes and produce leukemias with an identical gene expression pattern.

WTS; whole transcriptome sequencing; GEP; gene expression profile, LMO; LIM-domain-only, BHLH; basic helix-loop-helix, CNA: copy number alteration

**Supplemental Table 8.** ICC Myeloid Neoplasm/Acute Leukemia Disease Co-chairs and Work Group Participants.

**Co-Chairs**

Daniel Arber  
Robert Hasserjian  
Attilio Orazi  
Mario Cazzola  
Hartmut Döhner  
Ayalew Tefferi

**Chronic Myeloid Leukemia**

Hans-Michael Kvasnicka (lead)  
Ayalew Tefferi (lead)  
Susan Bradford  
Carlos Bueso-Ramos  
Jorge Cortes  
Attilio Orazi  
Annette Schmitt-Graeff

**Myeloproliferative Neoplasms**

Hans-Michael Kvasnicka (lead)  
Ayalew Tefferi (lead)  
Naseema Gangat  
Umberto Gianelli  
Attilio Orazi  
Jürgen Thiele  
Alessandro M. Vannucchi

**Eosinophilic and Mast Cell Disorders**

Sa A. Wang (lead)  
Ayalew Tefferi (lead)  
Daniel Arber  
Jason Gotlib  
Robert Hasserjian  
Attilio Orazi  
Andreas Reiter  
Alexander Tzankov

**Myelodysplastic/Myeloproliferative Neoplasms**

Attilio Orazi (lead)  
Luca Malcovati (lead)  
Daniel Arber  
Carlos Bueso-Ramos  
Mario Cazzola  
Robert Hasserjian  
Michael Savona

**Pre-malignant Clonal Cytopenias and Myelodysplastic Syndromes**

Robert Hasserjian (lead)

Mario Cazzola (lead)

Benjamin Ebert

Eva Hellström-Linberg

Attilio Orazi

Alberto Orfao

Maria Rozman

Sa A. Wang

**Pediatric and/or Germline Mutation-associated Disorders**

Katherine Calvo (lead)

Irith Baumann

Charlotte Niemeyer (lead)

Martina Rudelius

Akiko Shimamura

Olga Weinberg

**Acute Myeloid Leukemias**

Daniel Arber (lead)

Harmut Döhner (lead)

Hervé Dombret

Eric Duncavage

Kathryn Foucar

Robert Hasserjian

Bob Löwenberg

Attilio Orazi

Olga Weinberg

**Acute Lymphoblastic Leukemia**

Michael Borowitz (lead)

Harmut Döhner (lead)

Daniel Arber

Kathryn Foucar

Nicola Gökbuget

Elias Jabbour

Mignon Loh

Charles Mullighan

Ching-Hon Pui

**Cytogenetics**

Paola Dal Cin

Harmut Döhner

Michelle Le Beau

1. Niemeyer CM, Aric M, Basso G, et al. Chronic myelomonocytic leukemia in childhood: A retrospective analysis of 110 cases. *Blood*. 1997;89(10):3534-3543.
2. Iacobucci I, Kimura S, Mullighan CG. Biologic and Therapeutic Implications of Genomic Alterations in Acute Lymphoblastic Leukemia. *J Clin Med*. 2021;10(17).
3. Zaliva M, Stuchly J, Winkowska L, et al. Genomic landscape of pediatric B-other acute lymphoblastic leukemia in a consecutive European cohort. *Haematologica*. 2019;104(7):1396-1406.
4. Li JF, Dai YT, Lilljebjorn H, et al. Transcriptional landscape of B cell precursor acute lymphoblastic leukemia based on an international study of 1,223 cases. *Proc Natl Acad Sci U S A*. 2018;115(50):E11711-E11720.
5. Paietta E, Roberts KG, Wang V, et al. Molecular classification improves risk assessment in adult BCR-ABL1-negative B-ALL. *Blood*. 2021;138(11):948-958.
6. Lilljebjorn H, Fioretos T. New oncogenic subtypes in pediatric B-cell precursor acute lymphoblastic leukemia. *Blood*. 2017.
7. Liu Y, Easton J, Shao Y, et al. The genomic landscape of pediatric and young adult T-lineage acute lymphoblastic leukemia. *Nat Genet*. 2017;49(8):1211-1218.
8. Chang YH, Yu CH, Jou ST, et al. Targeted sequencing to identify genetic alterations and prognostic markers in pediatric T-cell acute lymphoblastic leukemia. *Sci Rep*. 2021;11(1):769.
9. Chen B, Jiang L, Zhong ML, et al. Identification of fusion genes and characterization of transcriptome features in T-cell acute lymphoblastic leukemia. *Proc Natl Acad Sci U S A*. 2018;115(2):373-378.
10. Cordo V, van der Zwet JCG, Cante-Barrett K, Pieters R, Meijerink JPP. T-cell Acute Lymphoblastic Leukemia: A Roadmap to Targeted Therapies. *Blood Cancer Discov*. 2021;2(1):19-31.
11. Girardi T, Vicente C, Cools J, De Keersmaecker K. The genetics and molecular biology of T-ALL. *Blood*. 2017;129(9):1113-1123.
12. van der Zwet JCG, Cordo V, Cante-Barrett K, Meijerink JPP. Multi-omic approaches to improve outcome for T-cell acute lymphoblastic leukemia patients. *Adv Biol Regul*. 2019;74:100647.
13. Bardelli V, Arniani S, Pierini V, et al. T-Cell Acute Lymphoblastic Leukemia: Biomarkers and Their Clinical Usefulness. *Genes (Basel)*. 2021;12(8).
14. Tran TH, Langlois S, Meloche C, et al. Whole-transcriptome analysis in acute lymphoblastic leukemia: a report from the DFCI ALL Consortium Protocol 16-001. *Blood Adv*. 2022;6(4):1329-1341.
